# Supplementary material for: Formation kinetics and photoelectrochemical properties of crystalline C70 one-dimensional microstructures
Source: Royal Society of Chemistry journal article supplement (doi:10.1039/c5ra03678j), 2015-01-01
Supplement: c5ra03678j1.pdf [file c5ra03678j1.pdf]

## Supporting Information of

# Formation Kinetics and Photoelectrochemical Properties of Crystalline C<sub>70</sub> One-Dimensional Microstructures

Shushu Zheng and Xing Lu\*

State Key Laboratory of Materials Processing and Die & Mould Technology, School of Materials Science and Engineering, Huazhong University of Science and Technology (HUST), Wuhan 430074, P.R.China

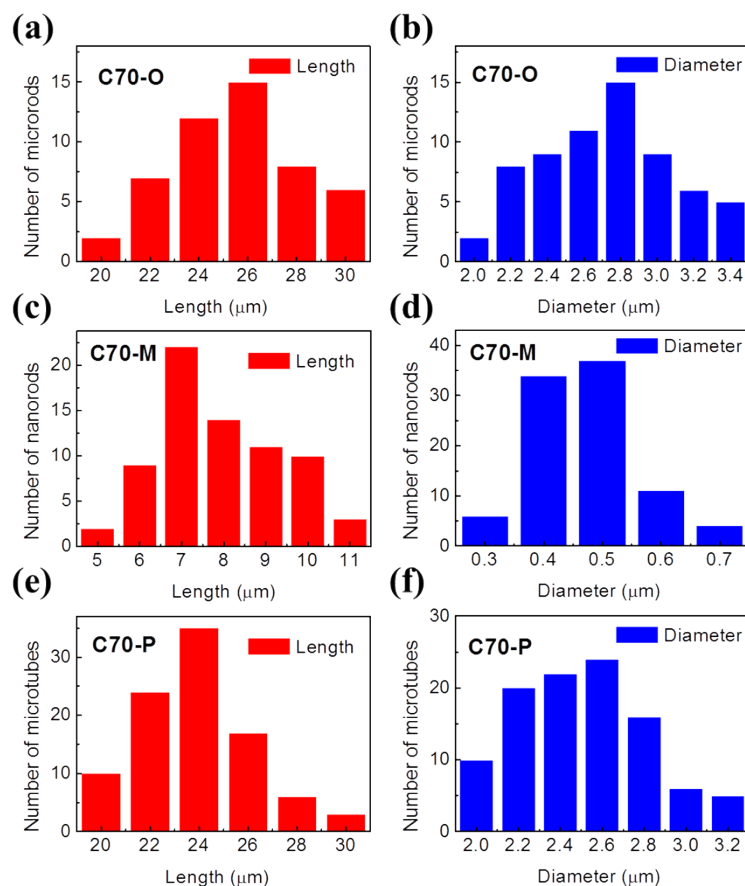

**Fig. S1** Distribution of (a, c, e) lengths and (b, d, f) diameters of the as-prepared C<sub>70</sub> 1D microstructures. (a-b) C70-O, (c-d) C70-M, (e-f) C70-P.

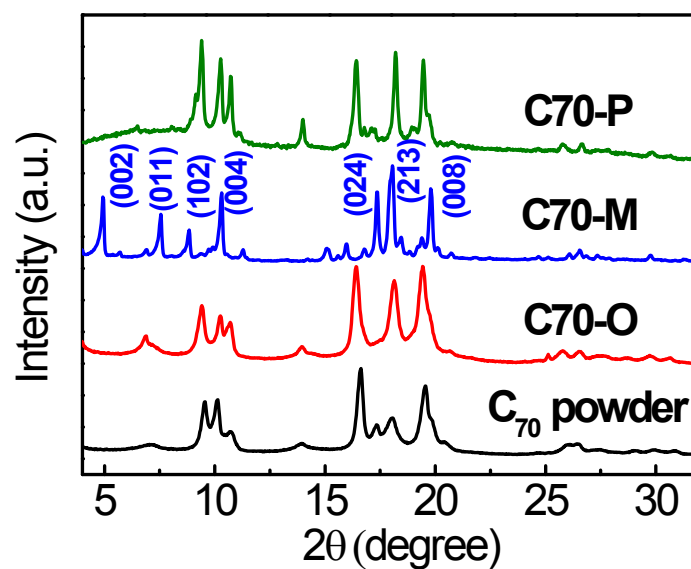

**Fig. S2** XRD patterns of the as-precipitated samples without any further treatment.

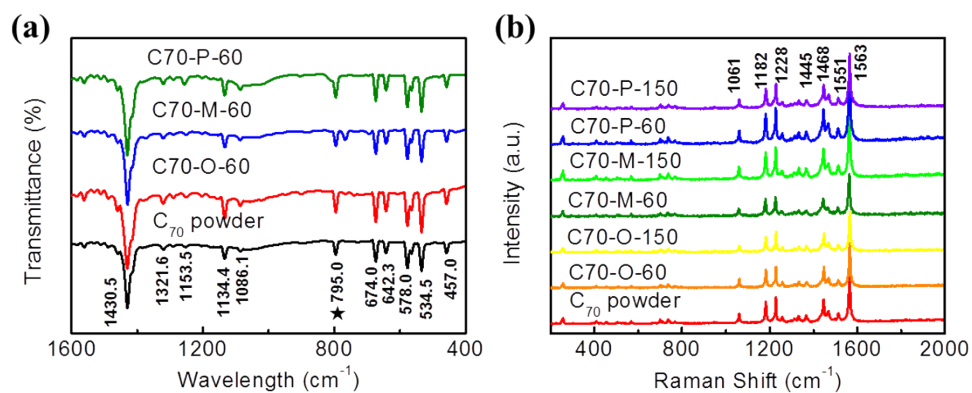

**Fig. S3** (a) FTIR spectra and (b) Raman spectra for  $C_{70}$  1D microstructures, ★ in (a) represents the solvent peak of *m*-xylene. The characteristic Raman and FTIR spectroscopic features of  $C_{70}$  molecules are present in all samples.<sup>S1</sup>

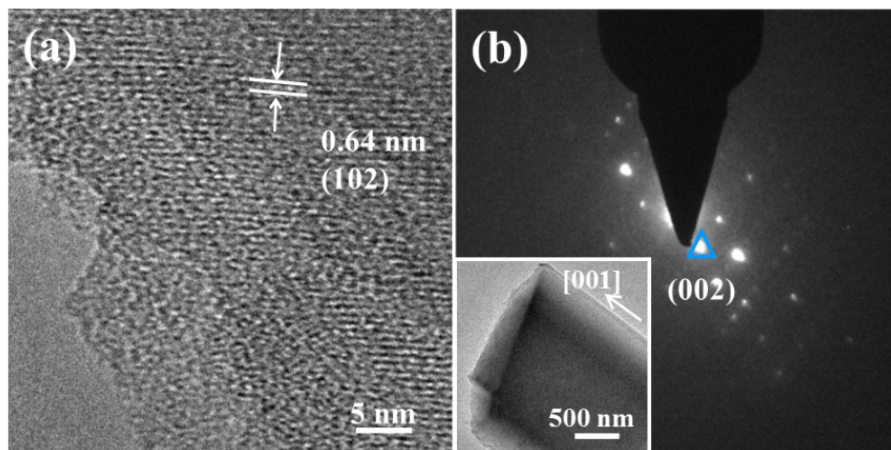

**Fig. S4** (a) HRTEM image and (b) SAED pattern of a microrod of C70-O as shown in the inset of (b).

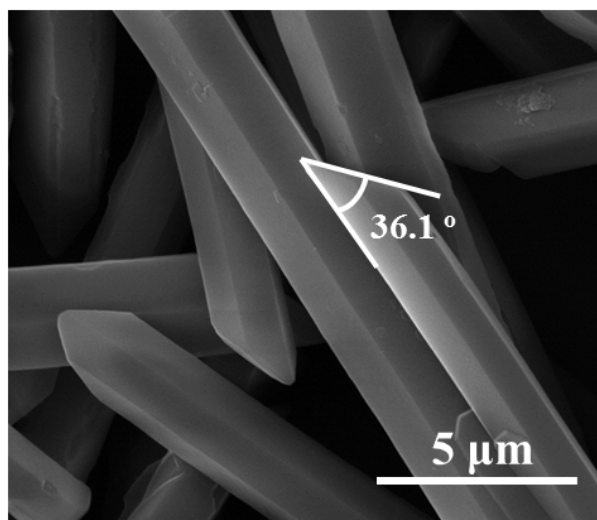

**Fig. S5** High-magnification SEM image of C70-P.

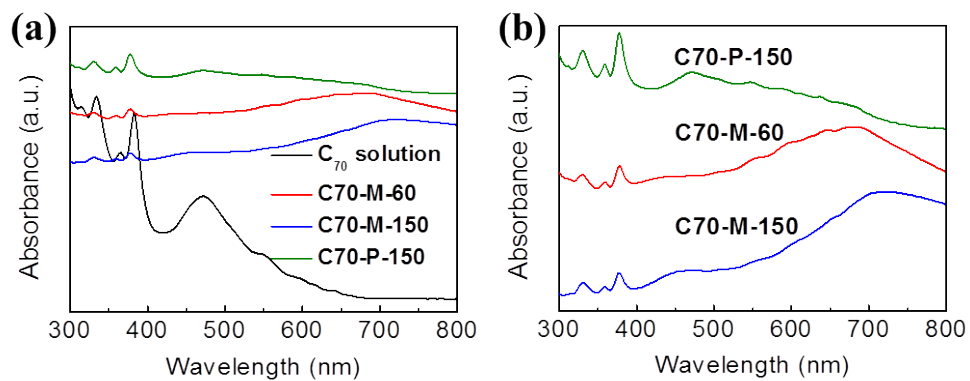

**Fig. S6** (a) UV-vis absorption spectra of  $C_{70}$  solution in toluene and  $C_{70}$  microstructures dispersed in IPA. (b) Magnified UV-vis absorption spectra of  $C_{70}$  microstructures dispersed in IPA.

**References:**

- S1. V. Schettino, M. Pagliai and G. Cardini, *J. Phys. Chem. A*, 2002, **106**, 1815-1823.
